# Supplementary material for: Tsinghua facial expression database – A database of facial expressions in Chinese young and older women and men: Development and validation
Source: PLOS journal article supplement (doi:10.1371/journal.pone.0231304), 2020-04-15
Supplement: S4 (10.1371/journal.pone.0231304.s004) [file journal.pone.0231304.s004]

| Model Age Group | Model Gender | Model Code | Actual Age (Years) | Image Name    | Induction Phase |
|-----------------|--------------|------------|--------------------|---------------|-----------------|
| Young           | Female       | 3          | 20                 | Y3F-20_happy  | 2               |
| Young           | Female       | 4          | 19                 | Y4F-19_happy  | 1               |
| Young           | Female       | 5          | 24                 | Y5F-24_happy  | 1               |
| Young           | Female       | 6          | 23                 | Y6F-23_happy  | 1               |
| Young           | Female       | 12         | 18                 | Y12F-18_happy | 1               |
| Young           | Female       | 13         | 20                 | Y13F-20_happy | 1               |
| Young           | Female       | 14         | 21                 | Y14F-21_happy | 1               |
| Young           | Female       | 17         | 33                 | Y17F-33_happy | 1               |
| Young           | Female       | 18         | 18                 | Y18F-18_happy | 1               |
| Young           | Female       | 19         | 19                 | Y19F-19_happy | 1               |
| Young           | Female       | 22         | 30                 | Y22F-30_happy | 1               |
| Young           | Female       | 23         | 30                 | Y23F-30_happy | 2               |
| Young           | Female       | 25         | 33                 | Y25F-33_happy | 1               |
| Young           | Female       | 26         | 32                 | Y26F-32_happy | 1               |
| Young           | Female       | 31         | 30                 | Y31F-30_happy | 1               |
| Young           | Female       | 32         | 20                 | Y32F-20_happy | 3               |
| Young           | Female       | 37         | 32                 | Y37F-32_happy | 1               |
| Young           | Female       | 38         | 24                 | Y38F-24_happy | 1               |
| Young           | Female       | 39         | 25                 | Y39F-25_happy | 1               |
| Young           | Female       | 40         | 28                 | Y40F-28_happy | 1               |
| Young           | Female       | 42         | 20                 | Y42F-20_happy | 1               |
| Young           | Female       | 48         | 23                 | Y48F-23_happy | 1               |
| Young           | Female       | 50         | 24                 | Y50F-24_happy | 1               |
| Young           | Female       | 51         | 23                 | Y51F-23_happy | 1               |
| Young           | Female       | 52         | 21                 | Y52F-21_happy | 1               |
| Young           | Female       | 59         | 23                 | Y59F-23_happy | 1               |
| Young           | Female       | 65         | 21                 | Y65F-21_happy | 1               |
| Young           | Female       | 66         | 26                 | Y66F-26_happy | 1               |
| Young           | Female       | 69         | 28                 | Y69F-28_happy | 1               |
| Young           | Female       | 71         | 20                 | Y71F-20_happy | 2               |
| Young           | Female       | 72         | 25                 | Y72F-25_happy | 1               |
| Young           | Male         | 1          | 19                 | Y1M-19_happy  | 1               |
| Young           | Male         | 2          | 21                 | Y2M-21_happy  | 2               |
| Young           | Male         | 8          | 27                 | Y8M-27_happy  | 1               |
| Young           | Male         | 10         | 22                 | Y10M-22_happy | 1               |
| Young           | Male         | 11         | 20                 | Y11M-20_happy | 1               |
| Young           | Male         | 15         | 20                 | Y15M-20_happy | 1               |
| Young           | Male         | 16         | 21                 | Y16M-21_happy | 1               |
| Young           | Male         | 21         | 21                 | Y21M-21_happy | 1               |
| Young           | Male         | 24         | 19                 | Y24M-19_happy | 2               |
| Young           | Male         | 27         | 23                 | Y27M-23_happy | 2               |
| Young           | Male         | 28         | 20                 | Y28M-20_happy | 2               |
| Young           | Male         | 29         | 21                 | Y29M-21_happy | 1               |
| Young           | Male         | 30         | 25                 | Y30M-25_happy | 1               |
| Young           | Male         | 33         | 25                 | Y33M-25_happy | 1               |
| Young           | Male         | 35         | 20                 | Y35M-20_happy | 1               |
| Young           | Male         | 36         | 30                 | Y36M-30_happy | 1               |
| Young           | Male         | 41         | 19                 | Y41M-19_happy | 1               |
| Young           | Male         | 44         | 26                 | Y44M-26_happy | 1               |
| Young           | Male         | 46         | 18                 | Y46M-18_happy | 1               |
| Young           | Male         | 47         | 23                 | Y47M-23_happy | 1               |
| Young           | Male         | 49         | 23                 | Y49M-23_happy | 1               |
| Young           | Male         | 53         | 23                 | Y53M-23_happy | 1               |
| Young           | Male         | 54         | 26                 | Y54M-26_happy | 1               |
| Young           | Male         | 55         | 24                 | Y55M-24_happy | 1               |
| Young           | Male         | 56         | 24                 | Y56M-24_happy | 1               |
| Young           | Male         | 57         | 23                 | Y57M-23_happy | 1               |
| Young           | Male         | 58         | 22                 | Y58M-22_happy | 1               |
| Young           | Male         | 60         | 24                 | Y60M-24_happy | 1               |
| Young           | Male         | 67         | 19                 | Y67M-19_happy | 1               |
| Young           | Male         | 68         | 30                 | Y68M-30_happy | 1               |
| Young           | Male         | 74         | 31                 | Y74M-31_happy | 2               |
| Young           | Male         | 75         | 30                 | Y75M-30_happy | 3               |
| Old             | Female       | 4          | 76                 | O04F-76_happy | 3               |
| Old             | Female       | 7          | 65                 | O07F-65_happy | 1               |
| Old             | Female       | 9          | 64                 | O09F-64_happy | 1               |
| Old             | Female       | 10         | 60                 | O10F-60_happy | 1               |
| Old             | Female       | 16         | 64                 | O16F-64_happy | 1               |
| Old             | Female       | 19         | 60                 | O19F-60_happy | 1               |
| Old             | Female       | 22         | 61                 | O22F-61_happy | 1               |
| Old             | Female       | 23         | 66                 | O23F-66_happy | 1               |
| Old             | Female       | 24         | 62                 | O24F-62_happy | 1               |
| Old             | Female       | 26         | 64                 | O26F-64_happy | 1               |
| Old             | Female       | 27         | 65                 | O27F-65_happy | 1               |
| Old             | Female       | 28         | 64                 | O28F-64_happy | 1               |
| Old             | Female       | 29         | 63                 | O29F-63_happy | 2               |
| Old             | Female       | 34         | 65                 | O34F-65_happy | 2               |
| Old             | Female       | 38         | 65                 | O38F-65_happy | 2               |
| Old             | Female       | 40         | 61                 | O40F-61_happy | 2               |
| Old             | Female       | 41         | 72                 | O41F-72_happy | 1               |
| Old             | Female       | 43         | 62                 | O43F-62_happy | 2               |
| Old             | Female       | 45         | 65                 | O45F-65_happy | 1               |
| Old             | Female       | 47         | 60                 | O47F-60_happy | 3               |
| Old             | Female       | 48         | 65                 | O48F-65_happy | 3               |
| Old             | Female       | 49         | 65                 | O49F-65_happy | 1               |
| Old             | Female       | 51         | 60                 | O51F-60_happy | 1               |
| Old             | Female       | 52         | 62                 | O52F-62_happy | 1               |
| Old             | Female       | 53         | 64                 | O53F-64_happy | 1               |
| Old             | Female       | 56         | 65                 | O56F-65_happy | 1               |
| Old             | Male         | 8          | 65                 | O08M-65_happy | 1               |
| Old             | Male         | 12         | 64                 | O12M-64_happy | 1               |
| Old             | Male         | 15         | 69                 | O15M-69_happy | 1               |
| Old             | Male         | 17         | 69                 | O17M-69_happy | 1               |
| Old             | Male         | 20         | 65                 | O20M-65_happy | 1               |
| Old             | Male         | 21         | 65                 | O21M-65_happy | 1               |
| Old             | Male         | 35         | 66                 | O35M-66_happy | 2               |
| Old             | Male         | 42         | 75                 | O42M-75_happy | 2               |
| Old             | Male         | 50         | 65                 | O50M-65_happy | 1               |
| Old             | Male         | 55         | 64                 | O55M-64_happy | 1               |
| Old             | Male         | 58         | 64                 | O58M-64_happy | 1               |
| Old             | Male         | 59         | 65                 | O59M-65_happy | 1               |
| Old             | Male         | 63         | 61                 | O63M-61_happy | 1               |
| Old             | Male         | 64         | 65                 | O64M-65_happy | 1               |
| Old             | Male         | 65         | 65                 | O65M-65_happy | 1               |
| Old             | Male         | 66         | 70                 | O66M-70_happy | 1               |
| Old             | Male         | 67         | 61                 | O67M-61_happy | 1               |
| Old             | Male         | 68         | 60                 | O68M-60_happy | 1               |
| Old             | Male         | 69         | 62                 | O69M-62_happy | 1               |
| Old             | Male         | 70         | 66                 | O70M-66_happy | 1               |
| Old             | Male         | 71         | 65                 | O71M-65_happy | 1               |

| Model Age Group | Model Gender | Model Code | Actual Age (Years) | Image Name      | Induction Phase |
|-----------------|--------------|------------|--------------------|-----------------|-----------------|
| Young           | Female       | 3          | 20                 | Y3F-20_content  | 1               |
| Young           | Female       | 4          | 19                 | Y4F-19_content  | 1               |
| Young           | Female       | 5          | 24                 | Y5F-24_content  | 1               |
| Young           | Female       | 6          | 23                 | Y6F-23_content  | 1               |
| Young           | Female       | 12         | 18                 | Y12F-18_content | 1               |
| Young           | Female       | 13         | 20                 | Y13F-20_content | 1               |
| Young           | Female       | 14         | 21                 | Y14F-21_content | 1               |
| Young           | Female       | 17         | 33                 | Y17F-33_content | 1               |
| Young           | Female       | 18         | 18                 | Y18F-18_content | 1               |
| Young           | Female       | 19         | 19                 | Y19F-19_content | 1               |
| Young           | Female       | 22         | 30                 | Y22F-30_content | 1               |
| Young           | Female       | 23         | 30                 | Y23F-30_content | 1               |
| Young           | Female       | 25         | 33                 | Y25F-33_content | 1               |
| Young           | Female       | 26         | 32                 | Y26F-32_content | 1               |
| Young           | Female       | 31         | 30                 | Y31F-30_content | 2               |
| Young           | Female       | 32         | 20                 | Y32F-20_content | 1               |
| Young           | Female       | 37         | 32                 | Y37F-32_content | 1               |
| Young           | Female       | 38         | 24                 | Y38F-24_content | 1               |
| Young           | Female       | 39         | 25                 | Y39F-25_content | 1               |
| Young           | Female       | 40         | 28                 | Y40F-28_content | 2               |
| Young           | Female       | 42         | 20                 | Y42F-20_content | 1               |
| Young           | Female       | 48         | 23                 | Y48F-23_content | 1               |
| Young           | Female       | 50         | 24                 | Y50F-24_content | 1               |
| Young           | Female       | 51         | 23                 | Y51F-23_content | 1               |
| Young           | Female       | 52         | 21                 | Y52F-21_content | 1               |
| Young           | Female       | 59         | 23                 | Y59F-23_content | 1               |
| Young           | Female       | 65         | 21                 | Y65F-21_content | 1               |
| Young           | Female       | 66         | 26                 | Y66F-26_content | 1               |
| Young           | Female       | 69         | 28                 | Y69F-28_content | 1               |
| Young           | Female       | 71         | 20                 | Y71F-20_content | 1               |
| Young           | Female       | 72         | 25                 | Y72F-25_content | 3               |
| Young           | Male         | 1          | 19                 | Y1M-19_content  | 1               |
| Young           | Male         | 2          | 21                 | Y2M-21_content  | 2               |
| Young           | Male         | 8          | 27                 | Y8M-27_content  | 1               |
| Young           | Male         | 10         | 22                 | Y10M-22_content | 1               |
| Young           | Male         | 11         | 20                 | Y11M-20_content | 1               |
| Young           | Male         | 15         | 20                 | Y15M-20_content | 1               |
| Young           | Male         | 16         | 21                 | Y16M-21_content | 1               |
| Young           | Male         | 21         | 21                 | Y21M-21_content | 3               |
| Young           | Male         | 24         | 19                 | Y24M-19_content | 2               |
| Young           | Male         | 27         | 23                 | Y27M-23_content | 1               |
| Young           | Male         | 28         | 20                 | Y28M-20_content | 1               |
| Young           | Male         | 29         | 21                 | Y29M-21_content | 1               |
| Young           | Male         | 30         | 25                 | Y30M-25_content | 1               |
| Young           | Male         | 33         | 25                 | Y33M-25_content | 1               |
| Young           | Male         | 35         | 20                 | Y35M-20_content | 1               |
| Young           | Male         | 36         | 30                 | Y36M-30_content | 2               |
| Young           | Male         | 41         | 19                 | Y41M-19_content | 3               |
| Young           | Male         | 44         | 26                 | Y44M-26_content | 1               |
| Young           | Male         | 46         | 18                 | Y46M-18_content | 1               |
| Young           | Male         | 47         | 23                 | Y47M-23_content | 1               |
| Young           | Male         | 49         | 23                 | Y49M-23_content | 1               |
| Young           | Male         | 53         | 23                 | Y53M-23_content | 1               |
| Young           | Male         | 54         | 26                 | Y54M-26_content | 1               |
| Young           | Male         | 55         | 24                 | Y55M-24_content | 1               |
| Young           | Male         | 56         | 24                 | Y56M-24_content | 1               |
| Young           | Male         | 57         | 23                 | Y57M-23_content | 1               |
| Young           | Male         | 58         | 22                 | Y58M-22_content | 1               |
| Young           | Male         | 60         | 24                 | Y60M-24_content | 1               |
| Young           | Male         | 67         | 19                 | Y67M-19_content | 1               |
| Young           | Male         | 68         | 30                 | Y68M-30_content | 2               |
| Young           | Male         | 74         | 31                 | Y74M-31_content | 1               |
| Young           | Male         | 75         | 30                 | Y75M-30_content | 1               |
| Old             | Female       | 7          | 65                 | O07F-65_content | 1               |
| Old             | Female       | 9          | 64                 | O09F-64_content | 1               |
| Old             | Female       | 10         | 60                 | O10F-60_content | 1               |
| Old             | Female       | 16         | 64                 | O16F-64_content | 1               |
| Old             | Female       | 19         | 60                 | O19F-60_content | 1               |
| Old             | Female       | 22         | 61                 | O22F-61_content | 1               |
| Old             | Female       | 23         | 66                 | O23F-66_content | 1               |
| Old             | Female       | 24         | 62                 | O24F-62_content | 1               |
| Old             | Female       | 26         | 64                 | O26F-64_content | 1               |
| Old             | Female       | 27         | 65                 | O27F-65_content | 1               |
| Old             | Female       | 28         | 64                 | O28F-64_content | 1               |
| Old             | Female       | 29         | 63                 | O29F-63_content | 1               |
| Old             | Female       | 34         | 65                 | O34F-65_content | 1               |
| Old             | Female       | 38         | 65                 | O38F-65_content | 2               |
| Old             | Female       | 40         | 61                 | O40F-61_content | 2               |
| Old             | Female       | 41         | 72                 | O41F-72_content | 2               |
| Old             | Female       | 43         | 62                 | O43F-62_content | 3               |
| Old             | Female       | 45         | 65                 | O45F-65_content | 2               |
| Old             | Female       | 47         | 60                 | O47F-60_content | 1               |
| Old             | Female       | 48         | 65                 | O48F-65_content | 2               |
| Old             | Female       | 49         | 65                 | O49F-65_content | 1               |
| Old             | Female       | 51         | 60                 | O51F-60_content | 1               |
| Old             | Female       | 52         | 62                 | O52F-62_content | 1               |
| Old             | Female       | 53         | 64                 | O53F-64_content | 1               |
| Old             | Female       | 56         | 65                 | O56F-65_content | 1               |
| Old             | Male         | 8          | 65                 | O08M-65_content | 1               |
| Old             | Male         | 12         | 64                 | O12M-64_content | 1               |
| Old             | Male         | 15         | 69                 | O15M-69_content | 1               |
| Old             | Male         | 17         | 69                 | O17M-69_content | 1               |
| Old             | Male         | 20         | 65                 | O20M-65_content | 1               |
| Old             | Male         | 21         | 65                 | O21M-65_content | 1               |
| Old             | Male         | 35         | 66                 | O35M-66_content | 2               |
| Old             | Male         | 42         | 75                 | O42M-75_content | 1               |
| Old             | Male         | 50         | 65                 | O50M-65_content | 1               |
| Old             | Male         | 55         | 64                 | O55M-64_content | 1               |
| Old             | Male         | 58         | 64                 | O58M-64_content | 1               |
| Old             | Male         | 59         | 65                 | O59M-65_content | 1               |
| Old             | Male         | 63         | 61                 | O63M-61_content | 1               |
| Old             | Male         | 64         | 65                 | O64M-65_content | 1               |
| Old             | Male         | 65         | 65                 | O65M-65_content | 1               |
| Old             | Male         | 66         | 70                 | O66M-70_content | 3               |
| Old             | Male         | 67         | 61                 | O67M-61_content | 1               |
| Old             | Male         | 68         | 60                 | O68M-60_content | 1               |
| Old             | Male         | 69         | 62                 | O69M-62_content | 1               |
| Old             | Male         | 70         | 66                 | O70M-66_content | 1               |
| Old             | Male         | 71         | 65                 | O71M-65_content | 1               |

| Model Age Group | Model Gender | Model Code | Actual Age (Years) | Image Name    | Induction Phase |
|-----------------|--------------|------------|--------------------|---------------|-----------------|
| Young           | Female       | 3          | 20                 | Y3F-20_sad    | 3               |
| Young           | Female       | 4          | 19                 | Y4F-19_sad    | 1               |
| Young           | Female       | 5          | 24                 | Y5F-24_sad    | 1               |
| Young           | Female       | 6          | 23                 | Y6F-23_sad    | 1               |
| Young           | Female       | 12         | 18                 | Y12F-18_sad   | 2               |
| Young           | Female       | 13         | 20                 | Y13F-20_sad   | 3               |
| Young           | Female       | 14         | 21                 | Y14F-21_sad   | 1               |
| Young           | Female       | 17         | 33                 | Y17F-33_sad   | 1               |
| Young           | Female       | 18         | 18                 | Y18F-18_sad   | 1               |
| Young           | Female       | 19         | 19                 | Y19F-19_sad   | 1               |
| Young           | Female       | 22         | 30                 | Y22F-30_sad   | 1               |
| Young           | Female       | 23         | 30                 | Y23F-30_sad   | 1               |
| Young           | Female       | 25         | 33                 | Y25F-33_sad_2 | 1               |
| Young           | Female       | 26         | 32                 | Y26F-32_sad   | 1               |
| Young           | Female       | 31         | 30                 | Y31F-30_sad   | 3               |
| Young           | Female       | 32         | 20                 | Y32F-20_sad   | 1               |
| Young           | Female       | 37         | 32                 | Y37F-32_sad   | 3               |
| Young           | Female       | 38         | 24                 | Y38F-24_sad   | 1               |
| Young           | Female       | 39         | 25                 | Y39F-25_sad   | 1               |
| Young           | Female       | 40         | 28                 | Y40F-28_sad   | 1               |
| Young           | Female       | 42         | 20                 | Y42F-20_sad   | 1               |
| Young           | Female       | 48         | 23                 | Y48F-23_sad   | 1               |
| Young           | Female       | 50         | 24                 | Y50F-24_sad   | 1               |
| Young           | Female       | 51         | 23                 | Y51F-23_sad   | 1               |
| Young           | Female       | 52         | 21                 | Y52F-21_sad   | 1               |
| Young           | Female       | 59         | 23                 | Y59F-23_sad   | 1               |
| Young           | Female       | 65         | 21                 | Y65F-21_sad   | 1               |
| Young           | Female       | 66         | 26                 | Y66F-26_sad   | 2               |
| Young           | Female       | 69         | 28                 | Y69F-28_sad   | 1               |
| Young           | Female       | 71         | 20                 | Y71F-20_sad   | 3               |
| Young           | Female       | 72         | 25                 | Y72F-25_sad   | 3               |
| Young           | Male         | 1          | 19                 | Y1M-19_sad    | 1               |
| Young           | Male         | 2          | 21                 | Y2M-21_sad    | 3               |
| Young           | Male         | 8          | 27                 | Y8M-27_sad    | 3               |
| Young           | Male         | 10         | 22                 | Y10M-22_sad   | 1               |
| Young           | Male         | 11         | 20                 | Y11M-20_sad   | 1               |
| Young           | Male         | 15         | 20                 | Y15M-20_sad   | 1               |
| Young           | Male         | 16         | 21                 | Y16M-21_sad   | 1               |
| Young           | Male         | 21         | 21                 | Y21M-21_sad   | 1               |
| Young           | Male         | 24         | 19                 | Y24M-19_sad   | 2               |
| Young           | Male         | 27         | 23                 | Y27M-23_sad   | 2               |
| Young           | Male         | 28         | 20                 | Y28M-20_sad   | 3               |
| Young           | Male         | 29         | 21                 | Y29M-21_sad   | 2               |
| Young           | Male         | 33         | 25                 | Y33M-25_sad   | 1               |
| Young           | Male         | 35         | 20                 | Y35M-20_sad   | 3               |
| Young           | Male         | 36         | 30                 | Y36M-30_sad   | 1               |
| Young           | Male         | 41         | 19                 | Y41M-19_sad   | 3               |
| Young           | Male         | 44         | 26                 | Y44M-26_sad   | 1               |
| Young           | Male         | 46         | 18                 | Y46M-18_sad   | 3               |
| Young           | Male         | 47         | 23                 | Y47M-23_sad   | 1               |
| Young           | Male         | 49         | 23                 | Y49M-23_sad   | 1               |
| Young           | Male         | 53         | 23                 | Y53M-23_sad   | 3               |
| Young           | Male         | 54         | 26                 | Y54M-26_sad   | 3               |
| Young           | Male         | 55         | 24                 | Y55M-24_sad   | 2               |
| Young           | Male         | 56         | 24                 | Y56M-24_sad   | 1               |
| Young           | Male         | 57         | 23                 | Y57M-23_sad   | 1               |
| Young           | Male         | 58         | 22                 | Y58M-22_sad   | 1               |
| Young           | Male         | 60         | 24                 | Y60M-24_sad   | 1               |
| Young           | Male         | 67         | 19                 | Y67M-19_sad   | 2               |
| Young           | Male         | 68         | 30                 | Y68M-30_sad   | 2               |
| Young           | Male         | 74         | 31                 | Y74M-31_sad   | 3               |
| Young           | Male         | 75         | 30                 | Y75M-30_sad   | 1               |
| Old             | Female       | 4          | 76                 | O04F-76_sad   | 2               |
| Old             | Female       | 7          | 65                 | O07F-65_sad   | 1               |
| Old             | Female       | 9          | 64                 | O09F-64_sad   | 1               |
| Old             | Female       | 10         | 60                 | O10F-60_sad   | 1               |
| Old             | Female       | 16         | 64                 | O16F-64_sad   | 3               |
| Old             | Female       | 19         | 60                 | O19F-60_sad   | 1               |
| Old             | Female       | 22         | 61                 | O22F-61_sad   | 3               |
| Old             | Female       | 23         | 66                 | O23F-66_sad   | 1               |
| Old             | Female       | 24         | 62                 | O24F-62_sad   | 1               |
| Old             | Female       | 26         | 64                 | O26F-64_sad   | 1               |
| Old             | Female       | 27         | 65                 | O27F-65_sad   | 1               |
| Old             | Female       | 28         | 64                 | O28F-64_sad   | 2               |
| Old             | Female       | 29         | 63                 | O29F-63_sad   | 3               |
| Old             | Female       | 34         | 65                 | O34F-65_sad   | 3               |
| Old             | Female       | 38         | 65                 | O38F-65_sad   | 3               |
| Old             | Female       | 40         | 61                 | O40F-61_sad   | 3               |
| Old             | Female       | 41         | 72                 | O41F-72_sad   | 3               |
| Old             | Female       | 43         | 62                 | O43F-62_sad   | 1               |
| Old             | Female       | 45         | 65                 | O45F-65_sad   | 2               |
| Old             | Female       | 47         | 60                 | O47F-60_sad   | 3               |
| Old             | Female       | 48         | 65                 | O48F-65_sad   | 2               |
| Old             | Female       | 49         | 65                 | O49F-65_sad   | 3               |
| Old             | Female       | 51         | 60                 | O51F-60_sad   | 1               |
| Old             | Female       | 52         | 62                 | O52F-62_sad   | 1               |
| Old             | Female       | 53         | 64                 | O53F-64_sad   | 1               |
| Old             | Female       | 56         | 65                 | O56F-65_sad   | 1               |
| Old             | Male         | 8          | 65                 | O08M-65_sad   | 3               |
| Old             | Male         | 12         | 64                 | O12M-64_sad   | 1               |
| Old             | Male         | 15         | 69                 | O15M-69_sad   | 1               |
| Old             | Male         | 17         | 69                 | O17M-69_sad   | 1               |
| Old             | Male         | 20         | 65                 | O20M-65_sad   | 1               |
| Old             | Male         | 21         | 65                 | O21M-65_sad   | 1               |
| Old             | Male         | 35         | 66                 | O35M-66_sad   | 2               |
| Old             | Male         | 42         | 75                 | O42M-75_sad   | 3               |
| Old             | Male         | 50         | 65                 | O50M-65_sad   | 1               |
| Old             | Male         | 55         | 64                 | O55M-64_sad   | 1               |
| Old             | Male         | 58         | 64                 | O58M-64_sad   | 2               |
| Old             | Male         | 59         | 65                 | O59M-65_sad   | 1               |
| Old             | Male         | 63         | 61                 | O63M-61_sad   | 1               |
| Old             | Male         | 64         | 65                 | O64M-65_sad   | 1               |
| Old             | Male         | 65         | 65                 | O65M-65_sad   | 3               |
| Old             | Male         | 66         | 70                 | O66M-70_sad   | 2               |
| Old             | Male         | 67         | 61                 | O67M-61_sad   | 1               |
| Old             | Male         | 68         | 60                 | O68M-60_sad   | 1               |
| Old             | Male         | 69         | 62                 | O69M-62_sad   | 3               |
| Old             | Male         | 70         | 66                 | O70M-66_sad   | 2               |
| Old             | Male         | 71         | 65                 | O71M-65_sad   | 1               |

| Model Age Group | Model Gender | Model Code | Actual Age (Years) | Image Name      | Induction Phase |
|-----------------|--------------|------------|--------------------|-----------------|-----------------|
| Young           | Female       | 3          | 20                 | Y3F-20_anger    | 1               |
| Young           | Female       | 4          | 19                 | Y4F-19_anger    | 1               |
| Young           | Female       | 5          | 24                 | Y5F-24_anger    | 2               |
| Young           | Female       | 6          | 23                 | Y6F-23_anger    | 1               |
| Young           | Female       | 12         | 18                 | Y12F-18_anger   | 1               |
| Young           | Female       | 13         | 20                 | Y13F-20_anger   | 1               |
| Young           | Female       | 14         | 21                 | Y14F-21_anger   | 1               |
| Young           | Female       | 17         | 33                 | Y17F-33_anger   | 1               |
| Young           | Female       | 18         | 18                 | Y18F-18_anger   | 1               |
| Young           | Female       | 19         | 19                 | Y19F-19_anger   | 1               |
| Young           | Female       | 22         | 30                 | Y22F-30_anger   | 1               |
| Young           | Female       | 23         | 30                 | Y23F-30_anger   | 1               |
| Young           | Female       | 25         | 33                 | Y25F-33_anger   | 2               |
| Young           | Female       | 26         | 32                 | Y26F-32_anger   | 1               |
| Young           | Female       | 31         | 30                 | Y31F-30_anger   | 2               |
| Young           | Female       | 32         | 20                 | Y32F-20_anger   | 1               |
| Young           | Female       | 37         | 32                 | Y37F-32_anger   | 3               |
| Young           | Female       | 38         | 24                 | Y38F-24_anger   | 1               |
| Young           | Female       | 39         | 25                 | Y39F-25_anger   | 1               |
| Young           | Female       | 40         | 28                 | Y40F-28_anger   | 1               |
| Young           | Female       | 42         | 20                 | Y42F-20_anger   | 1               |
| Young           | Female       | 48         | 23                 | Y48F-23_anger   | 1               |
| Young           | Female       | 50         | 24                 | Y50F-24_anger   | 1               |
| Young           | Female       | 51         | 23                 | Y51F-23_anger   | 1               |
| Young           | Female       | 52         | 21                 | Y52F-21_anger   | 1               |
| Young           | Female       | 59         | 23                 | Y59F-23_anger   | 1               |
| Young           | Female       | 65         | 21                 | Y65F-21_anger   | 1               |
| Young           | Female       | 66         | 26                 | Y66F-26_anger   | 2               |
| Young           | Female       | 69         | 28                 | Y69F-28_anger   | 3               |
| Young           | Female       | 71         | 20                 | Y71F-20_anger   | 1               |
| Young           | Female       | 72         | 25                 | Y72F-25_anger   | 2               |
| Young           | Male         | 1          | 19                 | Y1M-19_anger    | 1               |
| Young           | Male         | 2          | 21                 | Y2M-21_anger    | 3               |
| Young           | Male         | 8          | 27                 | Y8M-27_anger    | 1               |
| Young           | Male         | 10         | 22                 | Y10M-22_anger   | 1               |
| Young           | Male         | 11         | 20                 | Y11M-20_anger   | 1               |
| Young           | Male         | 15         | 20                 | Y15M-20_anger   | 3               |
| Young           | Male         | 16         | 21                 | Y16M-21_anger   | 1               |
| Young           | Male         | 21         | 21                 | Y21M-21_anger   | 1               |
| Young           | Male         | 24         | 19                 | Y24M-19_anger   | 2               |
| Young           | Male         | 27         | 23                 | Y27M-23_anger   | 3               |
| Young           | Male         | 28         | 20                 | Y28M-20_anger   | 1               |
| Young           | Male         | 29         | 21                 | Y29M-21_anger   | 1               |
| Young           | Male         | 33         | 25                 | Y33M-25_anger   | 1               |
| Young           | Male         | 35         | 20                 | Y35M-20_anger   | 2               |
| Young           | Male         | 36         | 30                 | Y36M-30_anger   | 1               |
| Young           | Male         | 41         | 19                 | Y41M-19_anger_1 | 3               |
| Young           | Male         | 44         | 26                 | Y44M-26_anger   | 1               |
| Young           | Male         | 46         | 18                 | Y46M-18_anger   | 1               |
| Young           | Male         | 47         | 23                 | Y47M-23_anger   | 1               |
| Young           | Male         | 49         | 23                 | Y49M-23_anger   | 1               |
| Young           | Male         | 53         | 23                 | Y53M-23_anger   | 1               |
| Young           | Male         | 54         | 26                 | Y54M-26_anger   | 1               |
| Young           | Male         | 55         | 24                 | Y55M-24_anger   | 1               |
| Young           | Male         | 56         | 24                 | Y56M-24_anger   | 1               |
| Young           | Male         | 57         | 23                 | Y57M-23_anger   | 1               |
| Young           | Male         | 58         | 22                 | Y58M-22_anger   | 1               |
| Young           | Male         | 60         | 24                 | Y60M-24_anger   | 1               |
| Young           | Male         | 67         | 19                 | Y67M-19_anger   | 1               |
| Young           | Male         | 68         | 30                 | Y68M-30_anger   | 1               |
| Young           | Male         | 74         | 31                 | Y74M-31_anger_1 | 2               |
| Young           | Male         | 75         | 30                 | Y75M-30_anger   | 1               |
| Old             | Female       | 4          | 76                 | O04F-76_anger   | 3               |
| Old             | Female       | 7          | 65                 | O07F-65_anger   | 1               |
| Old             | Female       | 9          | 64                 | O09F-64_anger   | 1               |
| Old             | Female       | 10         | 60                 | O10F-60_anger   | 3               |
| Old             | Female       | 16         | 64                 | O16F-64_anger   | 3               |
| Old             | Female       | 19         | 60                 | O19F-60_anger   | 1               |
| Old             | Female       | 22         | 61                 | O22F-61_anger   | 1               |
| Old             | Female       | 23         | 66                 | O23F-66_anger   | 1               |
| Old             | Female       | 24         | 62                 | O24F-62_anger   | 1               |
| Old             | Female       | 26         | 64                 | O26F-64_anger   | 1               |
| Old             | Female       | 27         | 65                 | O27F-65_anger   | 1               |
| Old             | Female       | 28         | 64                 | O28F-64_anger   | 1               |
| Old             | Female       | 29         | 63                 | O29F-63_anger   | 2               |
| Old             | Female       | 34         | 65                 | O34F-65_anger   | 2               |
| Old             | Female       | 38         | 65                 | O38F-65_anger   | 2               |
| Old             | Female       | 40         | 61                 | O40F-61_anger   | 2               |
| Old             | Female       | 41         | 72                 | O41F-72_anger   | 2               |
| Old             | Female       | 43         | 62                 | O43F-62_anger   | 1               |
| Old             | Female       | 45         | 65                 | O45F-65_anger   | 3               |
| Old             | Female       | 47         | 60                 | O47F-60_anger   | 3               |
| Old             | Female       | 48         | 65                 | O48F-65_anger   | 2               |
| Old             | Female       | 49         | 65                 | O49F-65_anger   | 1               |
| Old             | Female       | 51         | 60                 | O51F-60_anger   | 3               |
| Old             | Female       | 52         | 62                 | O52F-62_anger   | 1               |
| Old             | Female       | 53         | 64                 | O53F-64_anger   | 1               |
| Old             | Female       | 56         | 65                 | O56F-65_anger   | 1               |
| Old             | Male         | 8          | 65                 | O08M-65_anger   | 1               |
| Old             | Male         | 12         | 64                 | O12M-64_anger   | 3               |
| Old             | Male         | 15         | 69                 | O15M-69_anger   | 1               |
| Old             | Male         | 17         | 69                 | O17M-69_anger   | 1               |
| Old             | Male         | 20         | 65                 | O20M-65_anger   | 1               |
| Old             | Male         | 21         | 65                 | O21M-65_anger   | 1               |
| Old             | Male         | 35         | 66                 | O35M-66_anger   | 3               |
| Old             | Male         | 42         | 75                 | O42M-75_anger   | 1               |
| Old             | Male         | 50         | 65                 | O50M-65_anger   | 1               |
| Old             | Male         | 55         | 64                 | O55M-64_anger   | 1               |
| Old             | Male         | 58         | 64                 | O58M-64_anger   | 1               |
| Old             | Male         | 59         | 65                 | O59M-65_anger   | 2               |
| Old             | Male         | 63         | 61                 | O63M-61_anger   | 1               |
| Old             | Male         | 64         | 65                 | O64M-65_anger   | 1               |
| Old             | Male         | 65         | 65                 | O65M-65_anger   | 1               |
| Old             | Male         | 66         | 70                 | O66M-70_anger   | 1               |
| Old             | Male         | 67         | 61                 | O67M-61_anger   | 2               |
| Old             | Male         | 68         | 60                 | O68M-60_anger   | 1               |
| Old             | Male         | 69         | 62                 | O69M-62_anger   | 1               |
| Old             | Male         | 70         | 66                 | O70M-66_anger   | 1               |
| Old             | Male         | 71         | 65                 | O71M-65_anger   | 1               |

| Model Age Group | Model Gender | Model Code | Actual Age (Years) | Image Name   | Induction Phase |
|-----------------|--------------|------------|--------------------|--------------|-----------------|
| Young           | Female       | 3          | 20                 | Y3F-20_fear  | 2               |
| Young           | Female       | 4          | 19                 | Y4F-19_fear  | 1               |
| Young           | Female       | 5          | 24                 | Y5F-24_fear  | 1               |
| Young           | Female       | 6          | 23                 | Y6F-23_fear  | 1               |
| Young           | Female       | 12         | 18                 | Y12F-18_fear | 2               |
| Young           | Female       | 13         | 20                 | Y13F-20_fear | 3               |
| Young           | Female       | 14         | 21                 | Y14F-21_fear | 1               |
| Young           | Female       | 17         | 33                 | Y17F-33_fear | 1               |
| Young           | Female       | 18         | 18                 | Y18F-18_fear | 3               |
| Young           | Female       | 19         | 19                 | Y19F-19_fear | 3               |
| Young           | Female       | 22         | 30                 | Y22F-30_fear | 3               |
| Young           | Female       | 23         | 30                 | Y23F-30_fear | 3               |
| Young           | Female       | 25         | 33                 | Y25F-33_fear | 1               |
| Young           | Female       | 26         | 32                 | Y26F-32_fear | 1               |
| Young           | Female       | 31         | 30                 | Y31F-30_fear | 2               |
| Young           | Female       | 32         | 20                 | Y32F-20_fear | 2               |
| Young           | Female       | 37         | 32                 | Y37F-32_fear | 3               |
| Young           | Female       | 38         | 24                 | Y38F-24_fear | 1               |
| Young           | Female       | 39         | 25                 | Y39F-25_fear | 3               |
| Young           | Female       | 40         | 28                 | Y40F-28_fear | 1               |
| Young           | Female       | 42         | 20                 | Y42F-20_fear | 1               |
| Young           | Female       | 48         | 23                 | Y48F-23_fear | 3               |
| Young           | Female       | 50         | 24                 | Y50F-24_fear | 1               |
| Young           | Female       | 51         | 23                 | Y51F-23_fear | 1               |
| Young           | Female       | 52         | 21                 | Y52F-21_fear | 1               |
| Young           | Female       | 59         | 23                 | Y59F-23_fear | 1               |
| Young           | Female       | 65         | 21                 | Y65F-21_fear | 3               |
| Young           | Female       | 66         | 26                 | Y66F-26_fear | 3               |
| Young           | Female       | 69         | 28                 | Y69F-28_fear | 3               |
| Young           | Female       | 71         | 20                 | Y71F-20_fear | 3               |
| Young           | Female       | 72         | 25                 | Y72F-25_fear | 3               |
| Young           | Male         | 1          | 19                 | Y1M-19_fear  | 3               |
| Young           | Male         | 2          | 21                 | Y2M-21_fear  | 3               |
| Young           | Male         | 8          | 27                 | Y8M-27_fear  | 1               |
| Young           | Male         | 10         | 22                 | Y10M-22_fear | 2               |
| Young           | Male         | 11         | 20                 | Y11M-20_fear | 1               |
| Young           | Male         | 15         | 20                 | Y15M-20_fear | 1               |
| Young           | Male         | 16         | 21                 | Y16M-21_fear | 1               |
| Young           | Male         | 21         | 21                 | Y21M-21_fear | 1               |
| Young           | Male         | 24         | 19                 | Y24M-19_fear | 3               |
| Young           | Male         | 28         | 20                 | Y28M-20_fear | 2               |
| Young           | Male         | 29         | 21                 | Y29M-21_fear | 3               |
| Young           | Male         | 33         | 25                 | Y33M-25_fear | 2               |
| Young           | Male         | 35         | 20                 | Y35M-20_fear | 3               |
| Young           | Male         | 36         | 30                 | Y36M-30_fear | 3               |
| Young           | Male         | 41         | 19                 | Y41M-19_fear | 3               |
| Young           | Male         | 44         | 26                 | Y44M-26_fear | 1               |
| Young           | Male         | 46         | 18                 | Y46M-18_fear | 3               |
| Young           | Male         | 47         | 23                 | Y47M-23_fear | 1               |
| Young           | Male         | 49         | 23                 | Y49M-23_fear | 1               |
| Young           | Male         | 53         | 23                 | Y53M-23_fear | 1               |
| Young           | Male         | 54         | 26                 | Y54M-26_fear | 3               |
| Young           | Male         | 55         | 24                 | Y55M-24_fear | 2               |
| Young           | Male         | 56         | 24                 | Y56M-24_fear | 1               |
| Young           | Male         | 57         | 23                 | Y57M-23_fear | 1               |
| Young           | Male         | 58         | 22                 | Y58M-22_fear | 1               |
| Young           | Male         | 60         | 24                 | Y60M-24_fear | 1               |
| Young           | Male         | 67         | 19                 | Y67M-19_fear | 2               |
| Young           | Male         | 68         | 30                 | Y68M-30_fear | 3               |
| Young           | Male         | 74         | 31                 | Y74M-31_fear | 1               |
| Young           | Male         | 75         | 30                 | Y75M-30_fear | 1               |
| Old             | Female       | 4          | 76                 | O04F-76_fear | 3               |
| Old             | Female       | 7          | 65                 | O07F-65_fear | 3               |
| Old             | Female       | 9          | 64                 | O09F-64_fear | 1               |
| Old             | Female       | 10         | 60                 | O10F-60_fear | 1               |
| Old             | Female       | 16         | 64                 | O16F-64_fear | 1               |
| Old             | Female       | 19         | 60                 | O19F-60_fear | 1               |
| Old             | Female       | 22         | 61                 | O22F-61_fear | 1               |
| Old             | Female       | 23         | 66                 | O23F-66_fear | 1               |
| Old             | Female       | 24         | 62                 | O24F-62_fear | 1               |
| Old             | Female       | 26         | 64                 | O26F-64_fear | 1               |
| Old             | Female       | 27         | 65                 | O27F-65_fear | 3               |
| Old             | Female       | 28         | 64                 | O28F-64_fear | 3               |
| Old             | Female       | 29         | 63                 | O29F-63_fear | 3               |
| Old             | Female       | 34         | 65                 | O34F-65_fear | 2               |
| Old             | Female       | 38         | 65                 | O38F-65_fear | 3               |
| Old             | Female       | 40         | 61                 | O40F-61_fear | 1               |
| Old             | Female       | 41         | 72                 | O41F-72_fear | 3               |
| Old             | Female       | 43         | 62                 | O43F-62_fear | 3               |
| Old             | Female       | 45         | 65                 | O45F-65_fear | 3               |
| Old             | Female       | 47         | 60                 | O47F-60_fear | 3               |
| Old             | Female       | 48         | 65                 | O48F-65_fear | 2               |
| Old             | Female       | 49         | 65                 | O49F-65_fear | 1               |
| Old             | Female       | 51         | 60                 | O51F-60_fear | 1               |
| Old             | Female       | 52         | 62                 | O52F-62_fear | 1               |
| Old             | Female       | 53         | 64                 | O53F-64_fear | 1               |
| Old             | Female       | 56         | 65                 | O56F-65_fear | 1               |
| Old             | Male         | 8          | 65                 | O08M-65_fear | 3               |
| Old             | Male         | 12         | 64                 | O12M-64_fear | 1               |
| Old             | Male         | 15         | 69                 | O15M-69_fear | 1               |
| Old             | Male         | 17         | 69                 | O17M-69_fear | 1               |
| Old             | Male         | 20         | 65                 | O20M-65_fear | 1               |
| Old             | Male         | 21         | 65                 | O21M-65_fear | 1               |
| Old             | Male         | 35         | 66                 | O35M-66_fear | 3               |
| Old             | Male         | 42         | 75                 | O42M-75_fear | 3               |
| Old             | Male         | 50         | 65                 | O50M-65_fear | 1               |
| Old             | Male         | 55         | 64                 | O55M-64_fear | 1               |
| Old             | Male         | 58         | 64                 | O58M-64_fear | 1               |
| Old             | Male         | 59         | 65                 | O59M-65_fear | 1               |
| Old             | Male         | 63         | 61                 | O63M-61_fear | 1               |
| Old             | Male         | 64         | 65                 | O64M-65_fear | 1               |
| Old             | Male         | 65         | 65                 | O65M-65_fear | 3               |
| Old             | Male         | 66         | 70                 | O66M-70_fear | 1               |
| Old             | Male         | 67         | 61                 | O67M-61_fear | 2               |
| Old             | Male         | 68         | 60                 | O68M-60_fear | 3               |
| Old             | Male         | 69         | 62                 | O69M-62_fear | 2               |
| Old             | Male         | 70         | 66                 | O70M-66_fear | 3               |
| Old             | Male         | 71         | 65                 | O71M-65_fear | 1               |

| Model Age Group | Model Gender | Model Code | Actual Age (Years) | Image Name        | Induction Phase |
|-----------------|--------------|------------|--------------------|-------------------|-----------------|
| Young           | Female       | 3          | 20                 | Y3F-20_disgust    | 1               |
| Young           | Female       | 4          | 19                 | Y4F-19_disgust    | 1               |
| Young           | Female       | 5          | 24                 | Y5F-24_disgust    | 1               |
| Young           | Female       | 6          | 23                 | Y6F-23_disgust    | 1               |
| Young           | Female       | 12         | 18                 | Y12F-18_disgust   | 2               |
| Young           | Female       | 13         | 20                 | Y13F-20_disgust   | 1               |
| Young           | Female       | 14         | 21                 | Y14F-21_disgust   | 1               |
| Young           | Female       | 17         | 33                 | Y17F-33_disgust   | 1               |
| Young           | Female       | 18         | 18                 | Y18F-18_disgust   | 1               |
| Young           | Female       | 19         | 19                 | Y19F-19_disgust   | 1               |
| Young           | Female       | 22         | 30                 | Y22F-30_disgust   | 3               |
| Young           | Female       | 23         | 30                 | Y23F-30_disgust   | 1               |
| Young           | Female       | 25         | 33                 | Y25F-33_disgust   | 2               |
| Young           | Female       | 26         | 32                 | Y26F-32_disgust   | 1               |
| Young           | Female       | 31         | 30                 | Y31F-30_disgust   | 1               |
| Young           | Female       | 32         | 20                 | Y32F-20_disgust   | 1               |
| Young           | Female       | 37         | 32                 | Y37F-32_disgust   | 1               |
| Young           | Female       | 38         | 24                 | Y38F-24_disgust   | 1               |
| Young           | Female       | 39         | 25                 | Y39F-25_disgust   | 1               |
| Young           | Female       | 40         | 28                 | Y40F-28_disgust   | 1               |
| Young           | Female       | 42         | 20                 | Y42F-20_disgust   | 1               |
| Young           | Female       | 48         | 23                 | Y48F-23_disgust   | 1               |
| Young           | Female       | 50         | 24                 | Y50F-24_disgust   | 1               |
| Young           | Female       | 51         | 23                 | Y51F-23_disgust   | 1               |
| Young           | Female       | 52         | 21                 | Y52F-21_disgust   | 3               |
| Young           | Female       | 59         | 23                 | Y59F-23_disgust   | 1               |
| Young           | Female       | 65         | 21                 | Y65F-21_disgust   | 2               |
| Young           | Female       | 66         | 26                 | Y66F-26_disgust   | 1               |
| Young           | Female       | 69         | 28                 | Y69F-28_disgust   | 3               |
| Young           | Female       | 71         | 20                 | Y71F-20_disgust   | 2               |
| Young           | Female       | 72         | 25                 | Y72F-25_disgust   | 3               |
| Young           | Male         | 1          | 19                 | Y1M-19_disgust    | 1               |
| Young           | Male         | 2          | 21                 | Y2M-21_disgust    | 3               |
| Young           | Male         | 8          | 27                 | Y8M-27_disgust    | 1               |
| Young           | Male         | 10         | 22                 | Y10M-22_disgust   | 1               |
| Young           | Male         | 11         | 20                 | Y11M-20_disgust   | 1               |
| Young           | Male         | 15         | 20                 | Y15M-20_disgust   | 1               |
| Young           | Male         | 16         | 21                 | Y16M-21_disgust   | 1               |
| Young           | Male         | 21         | 21                 | Y21M-21_disgust   | 1               |
| Young           | Male         | 24         | 19                 | Y24M-19_disgust   | 2               |
| Young           | Male         | 27         | 23                 | Y27M-23_disgust   | 3               |
| Young           | Male         | 28         | 20                 | Y28M-20_disgust   | 3               |
| Young           | Male         | 29         | 21                 | Y29M-21_disgust   | 3               |
| Young           | Male         | 33         | 25                 | Y33M-25_disgust   | 1               |
| Young           | Male         | 35         | 20                 | Y35M-20_disgust   | 3               |
| Young           | Male         | 36         | 30                 | Y36M-30_disgust_1 | 1               |
| Young           | Male         | 41         | 19                 | Y41M-19_disgust   | 1               |
| Young           | Male         | 44         | 26                 | Y44M-26_disgust   | 1               |
| Young           | Male         | 46         | 18                 | Y46M-18_disgust   | 1               |
| Young           | Male         | 47         | 23                 | Y47M-23_disgust   | 1               |
| Young           | Male         | 49         | 23                 | Y49M-23_disgust   | 1               |
| Young           | Male         | 53         | 23                 | Y53M-23_disgust   | 1               |
| Young           | Male         | 54         | 26                 | Y54M-26_disgust   | 3               |
| Young           | Male         | 55         | 24                 | Y55M-24_disgust   | 1               |
| Young           | Male         | 56         | 24                 | Y56M-24_disgust   | 1               |
| Young           | Male         | 57         | 23                 | Y57M-23_disgust   | 1               |
| Young           | Male         | 58         | 22                 | Y58M-22_disgust   | 1               |
| Young           | Male         | 60         | 24                 | Y60M-24_disgust   | 2               |
| Young           | Male         | 67         | 19                 | Y67M-19_disgust   | 2               |
| Young           | Male         | 68         | 30                 | Y68M-30_disgust   | 2               |
| Young           | Male         | 75         | 30                 | Y75M-30_disgust   | 3               |
| Old             | Female       | 4          | 76                 | O04F-76_disgust   | 1               |
| Old             | Female       | 7          | 65                 | O07F-65_disgust   | 1               |
| Old             | Female       | 9          | 64                 | O09F-64_disgust   | 1               |
| Old             | Female       | 10         | 60                 | O10F-60_disgust   | 3               |
| Old             | Female       | 16         | 64                 | O16F-64_disgust   | 1               |
| Old             | Female       | 19         | 60                 | O19F-60_disgust   | 1               |
| Old             | Female       | 22         | 61                 | O22F-61_disgust   | 1               |
| Old             | Female       | 23         | 66                 | O23F-66_disgust   | 1               |
| Old             | Female       | 24         | 62                 | O24F-62_disgust   | 1               |
| Old             | Female       | 26         | 64                 | O26F-64_disgust   | 1               |
| Old             | Female       | 27         | 65                 | O27F-65_disgust   | 1               |
| Old             | Female       | 28         | 64                 | O28F-64_disgust   | 3               |
| Old             | Female       | 29         | 63                 | O29F-63_disgust   | 2               |
| Old             | Female       | 34         | 65                 | O34F-65_disgust   | 2               |
| Old             | Female       | 38         | 65                 | O38F-65_disgust   | 3               |
| Old             | Female       | 40         | 61                 | O40F-61_disgust   | 2               |
| Old             | Female       | 41         | 72                 | O41F-72_disgust   | 2               |
| Old             | Female       | 43         | 62                 | O43F-62_disgust   | 1               |
| Old             | Female       | 45         | 65                 | O45F-65_disgust   | 2               |
| Old             | Female       | 47         | 60                 | O47F-60_disgust   | 3               |
| Old             | Female       | 48         | 65                 | O48F-65_disgust   | 3               |
| Old             | Female       | 49         | 65                 | O49F-65_disgust   | 1               |
| Old             | Female       | 51         | 60                 | O51F-60_disgust   | 1               |
| Old             | Female       | 52         | 62                 | O52F-62_disgust   | 1               |
| Old             | Female       | 53         | 64                 | O53F-64_disgust   | 1               |
| Old             | Female       | 56         | 65                 | O56F-65_disgust   | 1               |
| Old             | Male         | 8          | 65                 | O08M-65_disgust   | 3               |
| Old             | Male         | 12         | 64                 | O12M-64_disgust   | 1               |
| Old             | Male         | 15         | 69                 | O15M-69_disgust   | 1               |
| Old             | Male         | 17         | 69                 | O17M-69_disgust   | 1               |
| Old             | Male         | 20         | 65                 | O20M-65_disgust   | 1               |
| Old             | Male         | 21         | 65                 | O21M-65_disgust   | 1               |
| Old             | Male         | 35         | 66                 | O35M-66_disgust   | 3               |
| Old             | Male         | 42         | 75                 | O42M-75_disgust   | 3               |
| Old             | Male         | 50         | 65                 | O50M-65_disgust   | 1               |
| Old             | Male         | 55         | 64                 | O55M-64_disgust   | 1               |
| Old             | Male         | 58         | 64                 | O58M-64_disgust   | 1               |
| Old             | Male         | 59         | 65                 | O59M-65_disgust   | 1               |
| Old             | Male         | 63         | 61                 | O63M-61_disgust   | 3               |
| Old             | Male         | 64         | 65                 | O64M-65_disgust   | 1               |
| Old             | Male         | 65         | 65                 | O65M-65_disgust   | 1               |
| Old             | Male         | 66         | 70                 | O66M-70_disgust   | 1               |
| Old             | Male         | 67         | 61                 | O67M-61_disgust   | 2               |
| Old             | Male         | 68         | 60                 | O68M-60_disgust   | 2               |
| Old             | Male         | 69         | 62                 | O69M-62_disgust   | 3               |
| Old             | Male         | 70         | 66                 | O70M-66_disgust   | 3               |
| Old             | Male         | 71         | 65                 | O71M-65_disgust   | 3               |

| Model | Age Group | Model Gender | Model Code | Actual Age (Years) | Image Name       | Induction Phase |
|-------|-----------|--------------|------------|--------------------|------------------|-----------------|
| Young |           | Female       | 3          | 20                 | Y3F-20_surprise  | 1               |
| Young |           | Female       | 4          | 19                 | Y4F-19_surprise  | 1               |
| Young |           | Female       | 5          | 24                 | Y5F-24_surprise  | 2               |
| Young |           | Female       | 6          | 23                 | Y6F-23_surprise  | 1               |
| Young |           | Female       | 12         | 18                 | Y12F-18_surprise | 1               |
| Young |           | Female       | 13         | 20                 | Y13F-20_surprise | 3               |
| Young |           | Female       | 14         | 21                 | Y14F-21_surprise | 1               |
| Young |           | Female       | 17         | 33                 | Y17F-33_surprise | 1               |
| Young |           | Female       | 18         | 18                 | Y18F-18_surprise | 1               |
| Young |           | Female       | 19         | 19                 | Y19F-19_surprise | 3               |
| Young |           | Female       | 22         | 30                 | Y22F-30_surprise | 1               |
| Young |           | Female       | 23         | 30                 | Y23F-30_surprise | 1               |
| Young |           | Female       | 25         | 33                 | Y25F-33_surprise | 2               |
| Young |           | Female       | 26         | 32                 | Y26F-32_surprise | 1               |
| Young |           | Female       | 31         | 30                 | Y31F-30_surprise | 2               |
| Young |           | Female       | 32         | 20                 | Y32F-20_surprise | 3               |
| Young |           | Female       | 37         | 32                 | Y37F-32_surprise | 3               |
| Young |           | Female       | 38         | 24                 | Y38F-24_surprise | 1               |
| Young |           | Female       | 39         | 25                 | Y39F-25_surprise | 1               |
| Young |           | Female       | 40         | 28                 | Y40F-28_surprise | 3               |
| Young |           | Female       | 42         | 20                 | Y42F-20_surprise | 1               |
| Young |           | Female       | 48         | 23                 | Y48F-23_surprise | 1               |
| Young |           | Female       | 50         | 24                 | Y50F-24_surprise | 1               |
| Young |           | Female       | 51         | 23                 | Y51F-23_surprise | 3               |
| Young |           | Female       | 52         | 21                 | Y52F-21_surprise | 1               |
| Young |           | Female       | 59         | 23                 | Y59F-23_surprise | 1               |
| Young |           | Female       | 65         | 21                 | Y65F-21_surprise | 2               |
| Young |           | Female       | 66         | 26                 | Y66F-26_surprise | 1               |
| Young |           | Female       | 69         | 28                 | Y69F-28_surprise | 3               |
| Young |           | Female       | 71         | 20                 | Y71F-20_surprise | 2               |
| Young |           | Female       | 72         | 25                 | Y72F-25_surprise | 3               |
| Young |           | Male         | 1          | 19                 | Y1M-19_surprise  | 2               |
| Young |           | Male         | 2          | 21                 | Y2M-21_surprise  | 3               |
| Young |           | Male         | 8          | 27                 | Y8M-27_surprise  | 1               |
| Young |           | Male         | 10         | 22                 | Y10M-22_surprise | 1               |
| Young |           | Male         | 11         | 20                 | Y11M-20_surprise | 1               |
| Young |           | Male         | 15         | 20                 | Y15M-20_surprise | 1               |
| Young |           | Male         | 16         | 21                 | Y16M-21_surprise | 1               |
| Young |           | Male         | 21         | 21                 | Y21M-21_surprise | 1               |
| Young |           | Male         | 24         | 19                 | Y24M-19_surprise | 3               |
| Young |           | Male         | 27         | 23                 | Y27M-23_surprise | 3               |
| Young |           | Male         | 28         | 20                 | Y28M-20_surprise | 1               |
| Young |           | Male         | 29         | 21                 | Y29M-21_surprise | 1               |
| Young |           | Male         | 30         | 25                 | Y30M-25_surprise | 1               |
| Young |           | Male         | 33         | 25                 | Y33M-25_surprise | 2               |
| Young |           | Male         | 35         | 20                 | Y35M-20_surprise | 1               |
| Young |           | Male         | 36         | 30                 | Y36M-30_surprise | 2               |
| Young |           | Male         | 41         | 19                 | Y41M-19_surprise | 1               |
| Young |           | Male         | 44         | 26                 | Y44M-26_surprise | 1               |
| Young |           | Male         | 46         | 18                 | Y46M-18_surprise | 1               |
| Young |           | Male         | 47         | 23                 | Y47M-23_surprise | 1               |
| Young |           | Male         | 49         | 23                 | Y49M-23_surprise | 1               |
| Young |           | Male         | 53         | 23                 | Y53M-23_surprise | 1               |
| Young |           | Male         | 54         | 26                 | Y54M-26_surprise | 1               |
| Young |           | Male         | 55         | 24                 | Y55M-24_surprise | 1               |
| Young |           | Male         | 56         | 24                 | Y56M-24_surprise | 1               |
| Young |           | Male         | 57         | 23                 | Y57M-23_surprise | 1               |
| Young |           | Male         | 58         | 22                 | Y58M-22_surprise | 1               |
| Young |           | Male         | 60         | 24                 | Y60M-24_surprise | 1               |
| Young |           | Male         | 67         | 19                 | Y67M-19_surprise | 1               |
| Young |           | Male         | 68         | 30                 | Y68M-30_surprise | 3               |
| Young |           | Male         | 74         | 31                 | Y74M-31_surprise | 2               |
| Young |           | Male         | 75         | 30                 | Y75M-30_surprise | 1               |
| Old   |           | Female       | 4          | 76                 | O04F-76_surprise | 3               |
| Old   |           | Female       | 7          | 65                 | O07F-65_surprise | 3               |
| Old   |           | Female       | 9          | 64                 | O09F-64_surprise | 1               |
| Old   |           | Female       | 10         | 60                 | O10F-60_surprise | 1               |
| Old   |           | Female       | 16         | 64                 | O16F-64_surprise | 1               |
| Old   |           | Female       | 19         | 60                 | O19F-60_surprise | 1               |
| Old   |           | Female       | 22         | 61                 | O22F-61_surprise | 1               |
| Old   |           | Female       | 23         | 66                 | O23F-66_surprise | 1               |
| Old   |           | Female       | 24         | 62                 | O24F-62_surprise | 1               |
| Old   |           | Female       | 26         | 64                 | O26F-64_surprise | 1               |
| Old   |           | Female       | 27         | 65                 | O27F-65_surprise | 1               |
| Old   |           | Female       | 28         | 64                 | O28F-64_surprise | 3               |
| Old   |           | Female       | 29         | 63                 | O29F-63_surprise | 3               |
| Old   |           | Female       | 34         | 65                 | O34F-65_surprise | 2               |
| Old   |           | Female       | 38         | 65                 | O38F-65_surprise | 3               |
| Old   |           | Female       | 40         | 61                 | O40F-61_surprise | 3               |
| Old   |           | Female       | 41         | 72                 | O41F-72_surprise | 3               |
| Old   |           | Female       | 43         | 62                 | O43F-62_surprise | 3               |
| Old   |           | Female       | 45         | 65                 | O45F-65_surprise | 2               |
| Old   |           | Female       | 47         | 60                 | O47F-60_surprise | 2               |
| Old   |           | Female       | 48         | 65                 | O48F-65_surprise | 2               |
| Old   |           | Female       | 49         | 65                 | O49F-65_surprise | 1               |
| Old   |           | Female       | 51         | 60                 | O51F-60_surprise | 1               |
| Old   |           | Female       | 52         | 62                 | O52F-62_surprise | 1               |
| Old   |           | Female       | 53         | 64                 | O53F-64_surprise | 1               |
| Old   |           | Female       | 56         | 65                 | O56F-65_surprise | 1               |
| Old   |           | Male         | 8          | 65                 | O08M-65_surprise | 1               |
| Old   |           | Male         | 12         | 64                 | O12M-64_surprise | 1               |
| Old   |           | Male         | 15         | 69                 | O15M-69_surprise | 1               |
| Old   |           | Male         | 17         | 69                 | O17M-69_surprise | 1               |
| Old   |           | Male         | 20         | 65                 | O20M-65_surprise | 1               |
| Old   |           | Male         | 21         | 65                 | O21M-65_surprise | 1               |
| Old   |           | Male         | 35         | 66                 | O35M-66_surprise | 2               |
| Old   |           | Male         | 42         | 75                 | O42M-75_surprise | 2               |
| Old   |           | Male         | 50         | 65                 | O50M-65_surprise | 1               |
| Old   |           | Male         | 55         | 64                 | O55M-64_surprise | 1               |
| Old   |           | Male         | 58         | 64                 | O58M-64_surprise | 1               |
| Old   |           | Male         | 59         | 65                 | O59M-65_surprise | 1               |
| Old   |           | Male         | 63         | 61                 | O63M-61_surprise | 1               |
| Old   |           | Male         | 64         | 65                 | O64M-65_surprise | 1               |
| Old   |           | Male         | 65         | 65                 | O65M-65_surprise | 3               |
| Old   |           | Male         | 66         | 70                 | O66M-70_surprise | 1               |
| Old   |           | Male         | 67         | 61                 | O67M-61_surprise | 1               |
| Old   |           | Male         | 68         | 60                 | O68M-60_surprise | 2               |
| Old   |           | Male         | 69         | 62                 | O69M-62_surprise | 2               |
| Old   |           | Male         | 70         | 66                 | O70M-66_surprise | 2               |
| Old   |           | Male         | 71         | 65                 | O71M-65_surprise | 2               |

Note: It should be noted that the emotion can be accumulated gradually along the inductions, therefore we cannot confidently say that the emotional facial expression displayed on the final image were fully induced by the corresponding induction phase [especially the 2<sup>nd</sup> (personal event induction) and 3<sup>rd</sup> (controlled facial expression induction phase) due to the possible accumulation from previous induction/inductions].
